# Supplementary material
Source: ML conference proceedings conference paper supplement (https://proceedings.neurips.cc/paper_files/paper/2021/hash/219ece62fae865562d4510ea501cf349-Abstract.html)
Supplement: Supplementary file 1 [file 219ece62fae865562d4510ea501cf349-Supplemental.pdf]

## A Instantaneous Regret Bound

Conditioned on the event that (8) in Lemma 1 holds (with probability  $\geq 1 - \delta$ ), it follows that

$$\begin{aligned} c_f(\mathbf{x}_*; \alpha) &\leq c_{u_{t-1}}(\mathbf{x}_*; \alpha) \\ c_f(\mathbf{x}_t; \alpha) &\geq c_{l_{t-1}}(\mathbf{x}_t; \alpha). \end{aligned}$$

Therefore, with probability  $\geq 1 - \delta$ ,

$$\begin{aligned} r_t &\triangleq c_f(\mathbf{x}_*; \alpha) - c_f(\mathbf{x}_t; \alpha) \\ &\leq c_{u_{t-1}}(\mathbf{x}_*; \alpha) - c_{l_{t-1}}(\mathbf{x}_t; \alpha) \\ &\leq c_{u_{t-1}}(\mathbf{x}_t; \alpha) - c_{l_{t-1}}(\mathbf{x}_t; \alpha) \end{aligned} \tag{18}$$

where the last inequality is because  $\mathbf{x}_t \in \operatorname{argmax}_{\mathbf{x}} c_{u_{t-1}}(\mathbf{x}; \alpha)$ .

Based on the relationship between CVaR and VaR in (3),

$$\begin{aligned} c_{u_{t-1}}(\mathbf{x}_t; \alpha) - c_{l_{t-1}}(\mathbf{x}_t; \alpha) &= \frac{1}{\alpha} \int_0^\alpha v_{u_{t-1}}(\mathbf{x}_t; \alpha') - v_{l_{t-1}}(\mathbf{x}_t; \alpha') d\alpha' \\ &\leq \frac{1}{\alpha} \int_0^\alpha v_{u_{t-1}}(\mathbf{x}_t; \alpha_t) - v_{l_{t-1}}(\mathbf{x}_t; \alpha_t) d\alpha' \\ &= v_{u_{t-1}}(\mathbf{x}_t; \alpha_t) - v_{l_{t-1}}(\mathbf{x}_t; \alpha_t) \end{aligned} \tag{19}$$

where  $\alpha_t \in \operatorname{argmax}_{\alpha' \in (0, \alpha]} v_{u_{t-1}}(\mathbf{x}_t; \alpha') - v_{l_{t-1}}(\mathbf{x}_t; \alpha')$  (7).

As  $\mathbf{w}_t$  is selected as an LV w.r.t.  $\alpha_t$ ,  $\mathbf{x}_t$ ,  $l_{t-1}$ , and  $u_{t-1}$ ,

$$l_{t-1}(\mathbf{x}_t, \mathbf{w}_t) \leq v_{l_{t-1}}(\mathbf{x}_t; \alpha_t) \leq v_{u_{t-1}}(\mathbf{x}_t; \alpha_t) \leq u_{t-1}(\mathbf{x}_t, \mathbf{w}_t).$$

Therefore,

$$\begin{aligned} v_{u_{t-1}}(\mathbf{x}_t; \alpha_t) - v_{l_{t-1}}(\mathbf{x}_t; \alpha_t) &\leq u_{t-1}(\mathbf{x}_t, \mathbf{w}_t) - l_{t-1}(\mathbf{x}_t, \mathbf{w}_t) \\ &= 2\beta_t^{1/2} \sigma_{t-1}(\mathbf{x}_t, \mathbf{w}_t) \end{aligned} \tag{20}$$

where the last equality is due to (5).

From (18), (19), and (20), we obtain (9), (10), and (11), respectively.

## B Proof of Theorem 1

From (11) and the nondecreasing property of  $\beta_t$ , with probability  $\geq 1 - \delta$ ,

$$\begin{aligned} R_T &= \sum_{t=1}^T r_t \leq \sum_{t=1}^T 2\beta_t^{1/2} \sigma_{t-1}(\mathbf{x}_t, \mathbf{w}_t) \\ &\leq 2\beta_T^{1/2} \sum_{t=1}^T \sigma_{t-1}(\mathbf{x}_t, \mathbf{w}_t) \\ &\leq 2\beta_T^{1/2} \sqrt{T \sum_{t=1}^T \sigma_{t-1}^2(\mathbf{x}_t, \mathbf{w}_t)} \end{aligned}$$

where the last inequality is due to the Cauchy-Schwarz inequality. Assuming  $\kappa(\mathbf{x}, \mathbf{w}) \leq 1$  for all  $\mathbf{x} \in \mathbb{X}$  and  $\mathbf{w} \in \mathbb{W}$ , Lemma 5.3 and Lemma 5.4 in [21] show that

$$2\beta_T^{1/2} \sqrt{T \sum_{t=1}^T \sigma_{t-1}^2(\mathbf{x}_t, \mathbf{w}_t)} \leq \sqrt{C_1 T \beta_T \gamma_T} \tag{21}$$

where  $C_1 = 8/\log(1 + \sigma_n^{-2})$  and  $\gamma_T$  is the maximum information gain about  $f$  that can be obtained by observing any set of  $T$  observations. Therefore,

$$R_T \leq \sqrt{C_1 T \beta_T \gamma_T}$$

holds with probability  $\geq 1 - \delta$ .

## C Decomposition of $r_t^{\text{Bayes}}$

By selecting  $\mathbf{x}_t$  as a sample from the posterior belief of  $\mathbf{x}_*$  given  $\mathbf{y}_{\mathbf{D}_{t-1}}$ , it is noted that the distribution of  $\mathbf{x}_t$  and  $\mathbf{x}_*$  are the same, i.e.,  $p(\mathbf{x}_t|\mathbf{y}_{\mathbf{D}_{t-1}}) = p(\mathbf{x}_*|\mathbf{y}_{\mathbf{D}_{t-1}})$ . Furthermore, given  $\mathbf{y}_{\mathbf{D}_{t-1}}$ ,  $u_{t-1}$  is a deterministic function, so  $p(c_{u_{t-1}}(\mathbf{x}_*; \alpha)|\mathbf{y}_{\mathbf{D}_{t-1}}) = p(c_{u_{t-1}}(\mathbf{x}_t; \alpha)|\mathbf{y}_{\mathbf{D}_{t-1}})$  and

$$\mathbb{E}[c_{u_{t-1}}(\mathbf{x}_*; \alpha)] = \mathbb{E}[c_{u_{t-1}}(\mathbf{x}_t; \alpha)] \quad (22)$$

Therefore, following [18], we can decompose  $r_t^{\text{Bayes}}$  as follows:

$$\begin{aligned} r_t^{\text{Bayes}} &\triangleq \mathbb{E}[c_f(\mathbf{x}_*; \alpha) - c_f(\mathbf{x}_t; \alpha)] \\ &= \mathbb{E}[c_f(\mathbf{x}_*; \alpha)] - \mathbb{E}[c_{u_{t-1}}(\mathbf{x}_*; \alpha)] + \mathbb{E}[c_{u_{t-1}}(\mathbf{x}_t; \alpha)] - \mathbb{E}[c_f(\mathbf{x}_t; \alpha)] \quad \text{from (22)} \\ &= \mathbb{E}[c_f(\mathbf{x}_*; \alpha)] - \mathbb{E}[c_{u_{t-1}}(\mathbf{x}_*; \alpha)] + \mathbb{E}[c_{u_{t-1}}(\mathbf{x}_t; \alpha)] - \mathbb{E}[c_{l_{t-1}}(\mathbf{x}_t; \alpha)] \\ &\quad + \mathbb{E}[c_{l_{t-1}}(\mathbf{x}_t; \alpha)] - \mathbb{E}[c_f(\mathbf{x}_t; \alpha)] \\ &= \mathbb{E}[c_{l_{t-1}}(\mathbf{x}_t; \alpha) - c_f(\mathbf{x}_t; \alpha)] + \mathbb{E}[c_f(\mathbf{x}_*; \alpha) - c_{u_{t-1}}(\mathbf{x}_*; \alpha)] \\ &\quad + \mathbb{E}[c_{u_{t-1}}(\mathbf{x}_t; \alpha) - c_{l_{t-1}}(\mathbf{x}_t; \alpha)] \end{aligned}$$

Since  $\mathbb{E}[Z] \leq \mathbb{E}[\max(0, Z)]$  for a random variable  $Z$ , it follows that

$$\begin{aligned} r_t^{\text{Bayes}} &\leq \mathbb{E}[\max(0, c_{l_{t-1}}(\mathbf{x}_t; \alpha) - c_f(\mathbf{x}_t; \alpha))] + \mathbb{E}[\max(0, c_f(\mathbf{x}_*; \alpha) - c_{u_{t-1}}(\mathbf{x}_*; \alpha))] \\ &\quad + \mathbb{E}[c_{u_{t-1}}(\mathbf{x}_t; \alpha) - c_{l_{t-1}}(\mathbf{x}_t; \alpha)] \\ &= \mathbb{E}[\Delta_c^{\text{lower}}(\mathbf{x}_t; \alpha)] + \mathbb{E}[\Delta_c^{\text{upper}}(\mathbf{x}_*; \alpha)] + \mathbb{E}[c_{u_{t-1}}(\mathbf{x}_t; \alpha) - c_{l_{t-1}}(\mathbf{x}_t; \alpha)] \end{aligned}$$

where  $\Delta_c^{\text{lower}}(\mathbf{x}_t; \alpha) \triangleq \max(0, c_{l_{t-1}}(\mathbf{x}_t; \alpha) - c_f(\mathbf{x}_t; \alpha))$  and  $\Delta_c^{\text{upper}}(\mathbf{x}_*; \alpha) \triangleq \max(0, c_f(\mathbf{x}_*; \alpha) - c_{u_{t-1}}(\mathbf{x}_*; \alpha))$ .

## D Proof of Lemma 2

$$\begin{aligned} \mathbb{E}[\Delta_c^{\text{lower}}(\mathbf{x}; \alpha)] &= \mathbb{E}[\max(0, c_{l_{t-1}}(\mathbf{x}; \alpha) - c_f(\mathbf{x}; \alpha))] \\ &= \mathbb{E}\left[\max\left(0, \frac{1}{\alpha} \int_0^\alpha (v_{l_{t-1}}(\mathbf{x}; \alpha') - v_f(\mathbf{x}; \alpha')) \, d\alpha'\right)\right] \\ &\leq \mathbb{E}\left[\frac{1}{\alpha} \int_0^\alpha \max(0, v_{l_{t-1}}(\mathbf{x}; \alpha') - v_f(\mathbf{x}; \alpha')) \, d\alpha'\right] \\ &= \frac{1}{\alpha} \int_0^\alpha \mathbb{E}[\max(0, v_{l_{t-1}}(\mathbf{x}; \alpha') - v_f(\mathbf{x}; \alpha'))] \, d\alpha' \\ &= \frac{1}{\alpha} \int_0^\alpha \mathbb{E}[\Delta_v^{\text{lower}}(\mathbf{x}; \alpha')] \, d\alpha' \end{aligned}$$

where  $\Delta_v^{\text{lower}}(\mathbf{x}; \alpha') \triangleq \max(0, v_{l_{t-1}}(\mathbf{x}; \alpha') - v_f(\mathbf{x}; \alpha'))$ .

## E Proof of Lemma 3

We prove the following Lemma 4 which is then used to prove Lemma 5. Lemma 3 follows from Lemma 5.

**Lemma 4.** Let  $\mathbb{W}_{l_{t-1}}^{\text{upper}} \triangleq \{\mathbf{w} \in \mathbb{W} : l_{t-1}(\mathbf{x}, \mathbf{w}) \geq v_{l_{t-1}}(\mathbf{x}; \alpha')\}$ , then  $P(\mathbf{W} \in \mathbb{W}_{l_{t-1}}^{\text{upper}}) > 1 - \alpha'$ .

*Proof.* By contradiction, if  $P(\mathbf{W} \in \mathbb{W}_{l_{t-1}}^{\text{upper}}) \leq 1 - \alpha'$ , then

$$P(\mathbf{W} \in \mathbb{W} \setminus \mathbb{W}_{l_{t-1}}^{\text{upper}}) = 1 - P(\mathbf{W} \in \mathbb{W}_{l_{t-1}}^{\text{upper}}) \geq \alpha'.$$

Furthermore, we assume that  $|\mathbb{W}|$  is finite, so the above implies that

$$P\left(l_{t-1}(\mathbf{x}, \mathbf{W}) \leq \max_{\mathbf{w} \in \mathbb{W} \setminus \mathbb{W}_{l_{t-1}}^{\text{upper}}} l_{t-1}(\mathbf{x}, \mathbf{w})\right) \geq \alpha'.$$

Therefore, from the definition of VaR,

$$\max_{\mathbf{w} \in \mathbb{W} \setminus \mathbb{W}_{l_{t-1}}^{\text{upper}}} l_{t-1}(\mathbf{x}, \mathbf{w}) \geq v_{l_{t-1}}(\mathbf{x}; \alpha').$$

From the definition of  $\mathbb{W}_{l_{t-1}}^{\text{upper}}$ , the above implies that

$$\max_{\mathbf{w} \in \mathbb{W} \setminus \mathbb{W}_{l_{t-1}}^{\text{upper}}} l_{t-1}(\mathbf{x}, \mathbf{w}) \in \mathbb{W}_{l_{t-1}}^{\text{upper}}.$$

However,  $\max_{\mathbf{w} \in \mathbb{W} \setminus \mathbb{W}_{l_{t-1}}^{\text{upper}}} l_{t-1}(\mathbf{x}, \mathbf{w}) \in \mathbb{W} \setminus \mathbb{W}_{l_{t-1}}^{\text{upper}}.$

Thus,  $\mathbb{W}_{l_{t-1}}^{\text{upper}} \cap (\mathbb{W} \setminus \mathbb{W}_{l_{t-1}}^{\text{upper}}) \neq \emptyset$

which is a contradiction.  $\square$

**Lemma 5.** Consider a realization  $f_1$  of the black-box function  $f$  following the GP posterior belief given  $\mathbf{y}_{\mathbf{D}_{t-1}}$  that satisfies

$$v_{l_{t-1}}(\mathbf{x}; \alpha') - v_{f_1}(\mathbf{x}; \alpha') > \omega \quad (23)$$

for  $\alpha' \in (0, 1)$ ,  $\mathbf{x} \in \mathbb{X}$ , and  $\omega \geq 0$ . Let  $\mathbb{W}_{l_{t-1}}^{\text{upper}} \triangleq \{\mathbf{w} \in \mathbb{W} : l_{t-1}(\mathbf{x}, \mathbf{w}) \geq v_{l_{t-1}}(\mathbf{x}; \alpha')\}$ . Then,

$$\exists \mathbf{w}_0 \in \mathbb{W}_{l_{t-1}}^{\text{upper}}, v_{l_{t-1}}(\mathbf{x}; \alpha') - f_1(\mathbf{x}, \mathbf{w}_0) > \omega.$$

*Proof.* By contradiction, if  $\forall \mathbf{w}_0 \in \mathbb{W}_{l_{t-1}}^{\text{upper}}, v_{l_{t-1}}(\mathbf{x}; \alpha') - f_1(\mathbf{x}, \mathbf{w}_0) \leq \omega$ , i.e.,  $\forall \mathbf{w}_0 \in \mathbb{W}_{l_{t-1}}^{\text{upper}}, f_1(\mathbf{x}, \mathbf{w}_0) + \omega \geq v_{l_{t-1}}(\mathbf{x}; \alpha')$ . Furthermore, from (23),  $v_{l_{t-1}}(\mathbf{x}; \alpha') > v_{f_1}(\mathbf{x}; \alpha') + \omega$ . Therefore,

$$\forall \mathbf{w}_0 \in \mathbb{W}_{l_{t-1}}^{\text{upper}}, f_1(\mathbf{x}, \mathbf{w}_0) + \omega > v_{f_1}(\mathbf{x}; \alpha') + \omega.$$

Equivalently,

$$\forall \mathbf{w}_0 \in \mathbb{W}_{l_{t-1}}^{\text{upper}}, f_1(\mathbf{x}, \mathbf{w}_0) > v_{f_1}(\mathbf{x}; \alpha'). \quad (24)$$

By Lemma 4, we have

$$P\left(f_1(\mathbf{x}, \mathbf{W}) \geq \min_{\mathbf{w} \in \mathbb{W}_{l_{t-1}}^{\text{upper}}} f_1(\mathbf{x}, \mathbf{w})\right) = P(\mathbf{W} \in \mathbb{W}_{l_{t-1}}^{\text{upper}}) > 1 - \alpha'. \quad (25)$$

Therefore,

$$\begin{aligned} 1 &= P(\mathbf{W} \in \mathbb{W}) \\ &\geq P(f_1(\mathbf{x}, \mathbf{W}) \leq v_{f_1}(\mathbf{x}; \alpha')) + P\left(f_1(\mathbf{x}, \mathbf{W}) \geq \min_{\mathbf{w} \in \mathbb{W}_{l_{t-1}}^{\text{upper}}} f_1(\mathbf{x}, \mathbf{w})\right) \text{ due to (24)} \\ &> \alpha' + 1 - \alpha' \text{ due to (25) and the definition of VaR} \\ &= 1 \end{aligned}$$

which is a contradiction.  $\square$

Recall that  $\mathbb{W}_{l_{t-1}}^{\text{upper}} \triangleq \{\mathbf{w} \in \mathbb{W} : l_{t-1}(\mathbf{x}, \mathbf{w}) \geq v_{l_{t-1}}(\mathbf{x}; \alpha')\}$ . Therefore,  $\forall \mathbf{w}_0 \in \mathbb{W}_{l_{t-1}}^{\text{upper}}, l_{t-1}(\mathbf{x}; \alpha') - f_1(\mathbf{x}, \mathbf{w}_0) \geq v_{l_{t-1}}(\mathbf{x}; \alpha') - f_1(\mathbf{x}, \mathbf{w}_0)$ . Thus, Lemma 5 implies Lemma 3.

## F Proof of Theorem 2

Recall  $f$  is considered as a random variable, Lemma 3 implies that

$$\begin{aligned} P(v_{l_{t-1}}(\mathbf{x}; \alpha') - v_f(\mathbf{x}; \alpha') > \omega) &\leq P(\exists \mathbf{w} \in \mathbb{W}_{l_{t-1}}^{\text{upper}}, l_{t-1}(\mathbf{x}, \mathbf{w}) - f(\mathbf{x}, \mathbf{w}) > \omega) \\ &\leq \sum_{\mathbf{w} \in \mathbb{W}_{l_{t-1}}^{\text{upper}}} P(l_{t-1}(\mathbf{x}, \mathbf{w}) - f(\mathbf{x}, \mathbf{w}) > \omega). \end{aligned} \quad (26)$$

From (16),

$$\begin{aligned}
\mathbb{E} [\Delta_v^{\text{lower}}(\mathbf{x}; \alpha')] &= \int_0^\infty P(v_{l_{t-1}}(\mathbf{x}; \alpha') - v_f(\mathbf{x}; \alpha') > \omega) d\omega \\
&\leq \int_0^\infty \sum_{\mathbf{w} \in \mathbb{W}_{l_{t-1}}^{\text{upper}}} P(l_{t-1}(\mathbf{x}, \mathbf{w}) - f(\mathbf{x}, \mathbf{w}) > \omega) d\omega \quad \text{from (26)} \\
&\leq \sum_{\mathbf{w} \in \mathbb{W}_{l_{t-1}}^{\text{upper}}} \int_0^\infty P(l_{t-1}(\mathbf{x}, \mathbf{w}) - f(\mathbf{x}, \mathbf{w}) > \omega) d\omega \\
&= \sum_{\mathbf{w} \in \mathbb{W}_{l_{t-1}}^{\text{upper}}} \mathbb{E} [\max(0, l_{t-1}(\mathbf{x}, \mathbf{w}) - f(\mathbf{x}, \mathbf{w}))]. \tag{27}
\end{aligned}$$

Since  $l_{t-1}(\mathbf{x}, \mathbf{w}) - f(\mathbf{x}, \mathbf{w})$  is a Gaussian random variable with mean  $l_{t-1}(\mathbf{x}, \mathbf{w}) - \mu_{t-1}(\mathbf{x}, \mathbf{w}) = -\beta_t^{1/2} \sigma_{t-1}(\mathbf{x}, \mathbf{w})$  and variance  $\sigma_{t-1}^2(\mathbf{x}, \mathbf{w})$ , it follows that

$$\begin{aligned}
&\mathbb{E} [\max(0, l_{t-1}(\mathbf{x}, \mathbf{w}) - f(\mathbf{x}, \mathbf{w}))] \\
&= \int_0^\infty \frac{\omega}{\sigma_{t-1}(\mathbf{x}, \mathbf{w}) \sqrt{2\pi}} \exp\left(-\frac{(\omega + \beta_t^{1/2} \sigma_{t-1}(\mathbf{x}, \mathbf{w}))^2}{2\sigma_{t-1}^2(\mathbf{x}, \mathbf{w})}\right) d\omega \\
&\leq \frac{\sigma_{t-1}(\mathbf{x}, \mathbf{w})}{\sqrt{2\pi}} \exp\left(\frac{-\beta_t}{2}\right) \\
&= \frac{\sigma_{t-1}(\mathbf{x}, \mathbf{w})}{\sqrt{2\pi}} \frac{\delta}{|\mathbb{X}||\mathbb{W}|\pi_t} \quad \text{since } \beta_t = 2 \log(|\mathbb{X}||\mathbb{W}|\pi_t/\delta) \text{ in Lemma 1} \\
&\leq \frac{\delta}{|\mathbb{X}||\mathbb{W}|\sqrt{2\pi}} \pi_t^{-1} \tag{28}
\end{aligned}$$

where the last inequality is due to the assumption  $\kappa(\mathbf{x}, \mathbf{w}) \leq 1 \forall (\mathbf{x}, \mathbf{w}) \in \mathbb{X} \times \mathbb{W}$ .

From (27) and (28),

$$\mathbb{E} [\Delta_v^{\text{lower}}(\mathbf{x}; \alpha')] \leq |\mathbb{W}_{l_{t-1}}^{\text{upper}}| \frac{\delta}{|\mathbb{X}||\mathbb{W}|\sqrt{2\pi}} \pi_t^{-1} \leq \frac{\delta}{|\mathbb{X}|\sqrt{2\pi}} \pi_t^{-1}. \tag{29}$$

Similar to the bound of  $\Delta_v^{\text{lower}}(\mathbf{x}; \alpha')$ , we can bound  $\Delta_v^{\text{upper}}(\mathbf{x}; \alpha')$  by considering the set  $\mathbb{W}_{u_{t-1}}^{\text{lower}} \triangleq \{\mathbf{w} \in \mathbb{W} : u_{t-1}(\mathbf{x}, \mathbf{w}) \leq v_{u_{t-1}}(\mathbf{x}; \alpha')\}$ :

$$\mathbb{E} [\Delta_v^{\text{upper}}(\mathbf{x}; \alpha')] \leq |\mathbb{W}_{u_{t-1}}^{\text{lower}}| \frac{\delta}{|\mathbb{X}||\mathbb{W}|\sqrt{2\pi}} \pi_t^{-1} \leq \frac{\delta}{|\mathbb{X}|\sqrt{2\pi}} \pi_t^{-1}. \tag{30}$$

From (15), (29) and (30), we have

$$\mathbb{E} [\Delta_c^{\text{lower}}(\mathbf{x}; \alpha)] \leq \frac{\delta}{|\mathbb{X}|\sqrt{2\pi}} \pi_t^{-1} \tag{31}$$

$$\mathbb{E} [\Delta_c^{\text{upper}}(\mathbf{x}; \alpha)] \leq \frac{\delta}{|\mathbb{X}|\sqrt{2\pi}} \pi_t^{-1}. \tag{32}$$

From (13), (14), (31), and (32),  $r_t^{\text{Bayes}}$  can be bounded:

$$r_t^{\text{Bayes}} \leq \frac{\delta\sqrt{2}}{|\mathbb{X}|\sqrt{\pi}} \pi_t^{-1} + 2\beta_t^{1/2} \sigma_{t-1}(\mathbf{x}_t, \mathbf{w}_t) \tag{33}$$

---

**Algorithm 2** CV-TS with batch queries for optimizing CVaR of a black-box function

---

```

1: Input:  $k, \mathbb{X}, \mathbb{W}$ , initial observation  $\mathbf{y}_{\mathbf{D}_0}$ , prior  $\mu_0 = 0, \sigma_n, \kappa$ 
2: for  $t = 1, 2, \dots$  do
3:   Sample  $k$  functions  $(f_j)_{j=1}^k$  from the GP posterior belief given  $\mathbf{y}_{\mathbf{D}_{k(t-1)}}$ 
4:   for  $j = 1, 2, \dots, k$  do
5:     Select  $\mathbf{x}_{k(t-1)+j} \in \operatorname{argmax}_{\mathbf{x}} c_{f_j}(\mathbf{x}; \alpha)$ 
6:     Find  $\alpha_{k(t-1)+j} \in \arg \max_{\alpha' \in (0, \alpha]} v_{u_{k(t-1)}}(\mathbf{x}_t; \alpha') - v_{l_{k(t-1)}}(\mathbf{x}_t; \alpha')$ 
7:     Given  $\alpha_{k(t-1)+j}$ , select  $\mathbf{w}_{k(t-1)+j}$  as an LV w.r.t.  $\mathbf{x}_{k(t-1)+j}$ ,  $u_{k(t-1)}$ , and  $l_{k(t-1)}$ .
8:   end for
9:   Incorporate new observations at the batch query:  $\mathbf{y}_{\mathbf{D}_{kt}} = \mathbf{y}_{\mathbf{D}_{k(t-1)}} \cup \{y(\mathbf{x}_i, \mathbf{w}_i)\}_{i=k(t-1)+1}^{kt}$ 
10:  Update the GP posterior belief given  $\mathbf{y}_{\mathbf{D}_{kt}}$  to obtain  $\mu_{kt}$  and  $\sigma_{kt}^2$ 
11: end for

```

---

Therefore, the Bayesian cumulative regret is bounded by:

$$\begin{aligned}
R_t^{\text{Bayes}} &= \mathbb{E} \left[ \sum_{t=1}^T r_t^{\text{Bayes}} \right] \\
&\leq \mathbb{E} \left[ \frac{\delta \sqrt{2}}{|\mathbb{X}| \sqrt{\pi}} \sum_{t=1}^T \pi_t^{-1} + \sum_{t=1}^T 2\beta_t^{1/2} \sigma_{t-1}(\mathbf{x}_t, \mathbf{w}_t) \right] \\
&\leq \frac{\delta \sqrt{2}}{|\mathbb{X}| \sqrt{\pi}} + \sqrt{C_1 T \beta_T \gamma_T}
\end{aligned} \tag{34}$$

where the last inequality is because  $\sum_{t=1}^T \pi_t^{-1} \leq \sum_{t \geq 1} \pi_t^{-1} = 1$  (in Lemma 1) and  $\sum_{t=1}^T 2\beta_t^{1/2} \sigma_{t-1}(\mathbf{x}_t, \mathbf{w}_t) \leq \sqrt{C_1 T \beta_T \gamma_T}$  shown in Appendix B.

## G CV-TS with Batch Queries

Let us consider CV-TS with a batch query of size  $k$  at each iteration. To simplify the notation, let us assume that the set of initial observations is empty, i.e.,  $\mathbf{D}_0 = \emptyset$ . Following the indexing of observed inputs from [11], inputs in the first batch query (at BO iteration  $t = 1$ ) are indexed by  $i = 1, \dots, k$ , inputs in the second batch query (at BO iteration  $t = 2$ ) are indexed by  $i = k + 1, \dots, 2k$ , and so on. We denote  $\mathbf{D}_i \triangleq \{\mathbf{x}_j\}_{j=1}^i$ . Then, the set of observed inputs at index  $i$  is  $\mathbf{D}_{k \lfloor \frac{i-1}{k} \rfloor}$  where  $\lfloor \frac{i-1}{k} \rfloor$  is the greatest integer less than or equal to  $\frac{i-1}{k}$ . At BO iteration  $t$ , CV-TS selects a batch query  $\{\mathbf{x}_i\}_{i=k(t-1)+1}^{kt}$  by drawing  $k$  samples of the maximizer of  $c_f(\mathbf{x}; \alpha)$  given observations at  $\{\mathbf{x}_j\}_{j=1}^{k(t-1)}$  (i.e.,  $\mathbf{D}_{k(t-1)}$ ).

Since at index  $i$  we only have access to observations  $\mathbf{y}_{\mathbf{D}_{k \lfloor \frac{i-1}{k} \rfloor}}$ , the confidence bound of  $f(\mathbf{x}, \mathbf{w})$  at index  $i$  is

$$\left[ l_{k \lfloor \frac{i-1}{k} \rfloor}(\mathbf{x}, \mathbf{w}), u_{k \lfloor \frac{i-1}{k} \rfloor}(\mathbf{x}, \mathbf{w}) \right].$$

At index  $i$ , given  $\mathbf{D}_{k \lfloor \frac{i-1}{k} \rfloor}$ , the distribution of  $\mathbf{x}_i$  is the same that that of  $\mathbf{x}_*$  (due to the selection strategy of CV-TS), so  $\mathbb{E} \left[ c_{u_{k \lfloor \frac{i-1}{k} \rfloor}}(\mathbf{x}_*; \alpha) \right] = \mathbb{E} \left[ c_{u_{k \lfloor \frac{i-1}{k} \rfloor}}(\mathbf{x}_i; \alpha) \right]$ . Let us use  $T$  to denote the total number of observations. Then,  $T$  is a multiple of  $k$  because there are  $k$  observations at each BO iteration and we assume that  $|\mathbf{D}_0| = \emptyset$ . We can decompose the Bayesian cumulative regret of CV-TS

with a batch query of size  $k$ , denoted as  $R_T^{\text{Bayes}}(k)$ :

$$\begin{aligned}
R_T^{\text{Bayes}}(k) &= \mathbb{E} \left[ \sum_{i=1}^T c_f(\mathbf{x}_*; \alpha) - c_f(\mathbf{x}_i; \alpha) \right] \\
&= \mathbb{E} \left[ \sum_{i=1}^T \underbrace{\mathbb{E} \left[ c_f(\mathbf{x}_*; \alpha) - c_{u_{k \lfloor \frac{i-1}{k} \rfloor}}(\mathbf{x}_*; \alpha) | \mathbf{y}_{\mathbf{D}_{k \lfloor \frac{i-1}{k} \rfloor}} \right]}_{A_0} \right] \\
&\quad + \mathbb{E} \left[ \underbrace{\sum_{i=1}^T c_{u_{k \lfloor \frac{i-1}{k} \rfloor}}(\mathbf{x}_i; \alpha) - c_{l_{k \lfloor \frac{i-1}{k} \rfloor}}(\mathbf{x}_i; \alpha)}_B \right] \\
&\quad + \mathbb{E} \left[ \sum_{i=1}^T \underbrace{\mathbb{E} \left[ c_{l_{k \lfloor \frac{i-1}{k} \rfloor}}(\mathbf{x}_i; \alpha) - c_f(\mathbf{x}_i; \alpha) | \mathbf{y}_{\mathbf{D}_{k \lfloor \frac{i-1}{k} \rfloor}} \right]}_{A_1} \right].
\end{aligned}$$

Similar to (31) and (32),  $A_0$  and  $A_1$  can be bounded by the tail expectations of CVaR which are bounded by  $\frac{\delta}{|\mathbb{X}| \sqrt{2\pi}} \pi_{k \lfloor \frac{i-1}{k} \rfloor}^{-1}$ . Then,

$$\mathbb{E} \left[ \sum_{i=1}^T A_0 \right] \leq \mathbb{E} \left[ \sum_{i=1}^T \frac{\delta}{|\mathbb{X}| \sqrt{2\pi}} \pi_{k \lfloor \frac{i-1}{k} \rfloor}^{-1} \right] = \frac{\delta}{|\mathbb{X}| \sqrt{2\pi}} \sum_{i=1}^T \pi_{k \lfloor \frac{i-1}{k} \rfloor}^{-1} \leq \frac{\delta}{|\mathbb{X}| \sqrt{2\pi}} \sum_{t \geq 1} \pi_t^{-1} = \frac{\delta}{|\mathbb{X}| \sqrt{2\pi}} \quad (35)$$

$$\mathbb{E} \left[ \sum_{i=1}^T A_1 \right] \leq \mathbb{E} \left[ \sum_{i=1}^T \frac{\delta}{|\mathbb{X}| \sqrt{2\pi}} \pi_{k \lfloor \frac{i-1}{k} \rfloor}^{-1} \right] = \frac{\delta}{|\mathbb{X}| \sqrt{2\pi}} \sum_{i=1}^T \pi_{k \lfloor \frac{i-1}{k} \rfloor}^{-1} \leq \frac{\delta}{|\mathbb{X}| \sqrt{2\pi}} \sum_{t \geq 1} \pi_t^{-1} \leq \frac{\delta}{|\mathbb{X}| \sqrt{2\pi}}. \quad (36)$$

The term  $B$  is bounded as follows.

$$\begin{aligned}
B &= \mathbb{E} \left[ \sum_{i=1}^T c_{u_{k \lfloor \frac{i-1}{k} \rfloor}}(\mathbf{x}_i; \alpha) - c_{l_{k \lfloor \frac{i-1}{k} \rfloor}}(\mathbf{x}_i; \alpha) \right] \\
&\leq \mathbb{E} \left[ \sum_{i=1}^T 2\beta_{k \lfloor \frac{i-1}{k} \rfloor + 1}^{1/2} \sigma_{k \lfloor \frac{i-1}{k} \rfloor}(\mathbf{x}_i, \mathbf{w}_i) \right] \quad (37)
\end{aligned}$$

$$\begin{aligned}
&= \mathbb{E} \left[ \sum_{i=1}^k 2\beta_{k \lfloor \frac{i-1}{k} \rfloor + 1}^{1/2} \sigma_{k \lfloor \frac{i-1}{k} \rfloor}(\mathbf{x}_i, \mathbf{w}_i) + \sum_{i=k+1}^T 2\beta_{k \lfloor \frac{i-1}{k} \rfloor + 1}^{1/2} \sigma_{k \lfloor \frac{i-1}{k} \rfloor}(\mathbf{x}_i, \mathbf{w}_i) \right] \\
&\leq \mathbb{E} \left[ \sum_{i=1}^k 2\beta_1^{1/2} + \sum_{i=k+1}^T 2\beta_{k \lfloor \frac{T-1}{k} \rfloor + 1}^{1/2} \sigma_{i-k-1}(\mathbf{x}_i, \mathbf{w}_i) \right] \quad (38)
\end{aligned}$$

$$\begin{aligned}
&\leq 2k\beta_1^{1/2} + \mathbb{E} \left[ 2\beta_{k \lfloor \frac{T-1}{k} \rfloor + 1}^{1/2} \sum_{i=1}^{T-k} \sigma_{i-1}(\mathbf{x}_i, \mathbf{w}_i) \right] \\
&\leq 2k\beta_1^{1/2} + \mathbb{E} \left[ 2\beta_{k \lfloor \frac{T-1}{k} \rfloor + 1}^{1/2} \sqrt{(T-k) \sum_{i=1}^{T-k} \sigma_{i-1}^2(\mathbf{x}_i, \mathbf{w}_i)} \right] \quad (39)
\end{aligned}$$

$$\leq 2k\beta_1^{1/2} + \sqrt{\frac{8(T-k)\beta_{k \lfloor \frac{T-1}{k} \rfloor + 1} \gamma_{T-k}}{\log(1 + \sigma_n^{-2})}} \quad (40)$$

$$\leq 2k\beta_1^{1/2} + \sqrt{C_1(T-k)\beta_{T-k+1} \gamma_{T-k}} \quad (41)$$

where

- (37) is because of (19) and (20).
- (38) is because  $\beta_t$  is nondecreasing,  $\kappa(\mathbf{x}, \mathbf{w}) \leq 1$  (our assumption), and  $\sigma_{i-k-1} \geq \sigma_{k \lfloor \frac{i-1}{k} \rfloor}$  for  $i = k+1, \dots, T$  (since  $\mathbf{D}_{i-k-1} \subset \mathbf{D}_{k \lfloor \frac{i-1}{k} \rfloor}$ ).
- (39) is because of the Cauchy-Schwarz inequality.
- (40) is because of Lemma 5.3 and Lemma 5.4 in [21] and our assumption  $\kappa(\mathbf{x}, \mathbf{w}) \leq 1$ .

From (35), (36), and (41), the Bayesian cumulative regret is bounded by:

$$R_T^{\text{Bayes}}(k) \leq \frac{\delta\sqrt{2}}{|\mathbb{X}|\sqrt{\pi}} + 2k\beta_1^{1/2} + \sqrt{C_1(T-k)\beta_{T-k+1}\gamma_{T-k}}. \quad (42)$$

Recall the Bayesian cumulative regret bound for CV-TS with single queries (i.e.,  $k = 1$ ) in (34):

$$R_T^{\text{Bayes}} \leq \frac{\delta\sqrt{2}}{|\mathbb{X}|\sqrt{\pi}} + \sqrt{C_1 T \beta_T \gamma_T}. \quad (43)$$

Hence, the average of the Bayesian cumulative regret for CV-TS with single queries,  $R_T^{\text{Bayes}}/T$ , and batch queries,  $R_T^{\text{Bayes}}(k)/T$ , are similar, especially when the number of observations  $T$  is large (so that  $2k\beta_1^{1/2}/T$  vanishes).

## H A Thompson Sampling Approach to Optimize VaR of Black-Box Functions

### H.1 Algorithm

We present an algorithm to optimize VaR  $v_f(\mathbf{x}; \alpha)$  of a black-box function  $f(\mathbf{x}, \mathbf{W})$ . Unlike the existing V-UCB algorithm in [13] that is based on the upper confidence bound, this algorithm is based on the Thompson sampling approach which is called V-TS (Algorithm 3).

Following the popular Thompson sampling approach (or posterior sampling [18]), V-TS selects  $\mathbf{x}_t$  as a sample of the maximizer of VaR  $v_f(\mathbf{x}; \alpha)$  by: (line 4 of Algorithm 3) using the random Fourier feature approximation method [16] to draw a function sample  $f_1$  from the GP posterior belief given  $\mathbf{y}_{\mathbf{D}_{t-1}}$  and (line 5 of Algorithm 3) assigning the maximizer of  $v_{f_1}(\mathbf{x}; \alpha)$  to  $\mathbf{x}_t$ .

Given the selected  $\mathbf{x}_t$ , we select  $\mathbf{w}_t$  to reduce the uncertainty of VaR  $v_f(\mathbf{x}_t; \alpha)$  quantified by the size of its confidence bound  $v_{u_{t-1}}(\mathbf{x}_t; \alpha) - v_{l_{t-1}}(\mathbf{x}_t; \alpha)$ . Following the same approach in Sec. 3.2, we select  $\mathbf{w}_t$  as an LV w.r.t.  $\alpha$ ,  $\mathbf{x}_t$ ,  $l_{t-1}$ , and  $u_{t-1}$  (line 7 of Algorithm 3). If there are multiple LVs, we select the LV with the maximum probability  $p(\mathbf{W})$ . It is a heuristic to improve the empirical performance suggested by [13].

Like CV-TS with batch queries (Appendix G), V-TS can also be extended to handle a batch query of size  $k$ , i.e., V-TS selects a batch of  $k$  inputs to query for their observations at each BO iteration. This batch of  $k$  inputs are obtained by: drawing  $k$  samples of the maximizer of  $v_f(\mathbf{x}; \alpha)$  given  $\mathbf{y}_{\mathbf{D}_{t-1}}$  and finding the corresponding  $k$  LVs w.r.t. these  $k$  samples,  $\alpha$ ,  $l_{t-1}$ , and  $u_{t-1}$ .

### H.2 Theoretical Analysis

Let us consider V-TS that selects a single query at each BO iteration (Algorithm 3). We would like to show that the Bayesian cumulative regret of V-TS is sublinear. Let  $\mathbf{x}_* \in \arg\max_{\mathbf{x} \in \mathbb{X}} v_f(\mathbf{x}; \alpha)$ . The Bayesian cumulative regret can be expressed as

$$\begin{aligned} R_T^{\text{Bayes}} &= \mathbb{E} \left[ \sum_{t=1}^T v_f(\mathbf{x}_*; \alpha) - v_f(\mathbf{x}_t; \alpha) \right] \\ &= \mathbb{E} \left[ \sum_{t=1}^T \mathbb{E} [v_f(\mathbf{x}_*; \alpha) - v_f(\mathbf{x}_t; \alpha) | \mathbf{y}_{\mathbf{D}_{t-1}}] \right]. \end{aligned}$$

---

**Algorithm 3** V-TS: A BO Algorithm for optimizing VaR of a black-box function

---

```
1: Input:  $\mathbb{X}, \mathbb{W}$ , initial observation  $\mathbf{y}_{\mathbf{D}_0}$ , prior  $\mu_0 = 0, \sigma_n, \kappa$ 
2: for  $t = 1, 2, \dots$  do
3:   {Selecting  $\mathbf{x}_t$ }
4:   Sample a function  $f_1$  from the GP posterior belief given  $\mathbf{y}_{\mathbf{D}_{t-1}}$ 
5:   Select  $\mathbf{x}_t \in \underset{\mathbf{x}}{\operatorname{argmax}} v_{f_1}(\mathbf{x}; \alpha)$ 
6:   {Selecting  $\mathbf{w}_t$ }
7:   Select  $\mathbf{w}_t$  as an LV w.r.t.  $\alpha, \mathbf{x}_t, u_{t-1}$ , and  $l_{t-1}$ 
8:   {Collecting data and updating GP}
9:   Incorporate new observation at input query:  $\mathbf{y}_{\mathbf{D}_t} = \mathbf{y}_{\mathbf{D}_{t-1}} \cup \{y(\mathbf{x}_t, \mathbf{w}_t)\}$ 
10:  Update the GP posterior belief given  $\mathbf{y}_{\mathbf{D}_t}$ 
11: end for
```

---

The expectation  $\mathbb{E}[v_f(\mathbf{x}_*; \alpha) - v_f(\mathbf{x}_t; \alpha) | \mathbf{y}_{\mathbf{D}_{t-1}}]$  can be decomposed into (in a similar fashion to (13) where we omit  $\mathbf{y}_{\mathbf{D}_{t-1}}$  to ease the notational clutter):

$$\begin{aligned} & \mathbb{E}[v_f(\mathbf{x}_*; \alpha) - v_{u_{t-1}}(\mathbf{x}_*; \alpha)] + \mathbb{E}[v_{u_{t-1}}(\mathbf{x}_*; \alpha) - v_{l_{t-1}}(\mathbf{x}_t; \alpha)] + \mathbb{E}[v_{l_{t-1}}(\mathbf{x}_t; \alpha) - v_f(\mathbf{x}_t; \alpha)] \\ &= \mathbb{E}[v_f(\mathbf{x}_*; \alpha) - v_{u_{t-1}}(\mathbf{x}_*; \alpha)] + \mathbb{E}[v_{u_{t-1}}(\mathbf{x}_t; \alpha) - v_{l_{t-1}}(\mathbf{x}_t; \alpha)] \\ & \quad + \mathbb{E}[v_{l_{t-1}}(\mathbf{x}_t; \alpha) - v_f(\mathbf{x}_t; \alpha)] \\ &\leq \mathbb{E}[\max(0, v_f(\mathbf{x}_*; \alpha) - v_{u_{t-1}}(\mathbf{x}_*; \alpha))] + \mathbb{E}[v_{u_{t-1}}(\mathbf{x}_t; \alpha) - v_{l_{t-1}}(\mathbf{x}_t; \alpha)] \\ & \quad + \mathbb{E}[\max(0, v_{l_{t-1}}(\mathbf{x}_t; \alpha) - v_f(\mathbf{x}_t; \alpha))] \\ &= \mathbb{E}[\Delta_v^{\text{upper}}(\mathbf{x}_*; \alpha)] + \mathbb{E}[v_{u_{t-1}}(\mathbf{x}_t; \alpha) - v_{l_{t-1}}(\mathbf{x}_t; \alpha)] + \mathbb{E}[\Delta_v^{\text{lower}}(\mathbf{x}_t; \alpha)] \end{aligned} \quad (44)$$

where (44) is because we select  $\mathbf{x}_t$  as a sample of the maximizer of  $v_f(\mathbf{x}; \alpha)$  given  $\mathbf{y}_{\mathbf{D}_{t-1}}$  (lines 4-5 of Algorithm 3), i.e., the distribution of  $\mathbf{x}_t$  is the same as that of  $\mathbf{x}_*$  given  $\mathbf{y}_{\mathbf{D}_{t-1}}$ .

The bounds of  $\mathbb{E}[\Delta_v^{\text{lower}}(\mathbf{x}_*; \alpha)]$  and  $\mathbb{E}[\Delta_v^{\text{upper}}(\mathbf{x}_t; \alpha)]$  are obtained from (29) and (30), while the bound of  $\mathbb{E}[v_{u_{t-1}}(\mathbf{x}_t; \alpha) - v_{l_{t-1}}(\mathbf{x}_t; \alpha)]$  is obtained from (20) (since  $\mathbf{w}_t$  is selected as an LV w.r.t.  $\alpha, \mathbf{x}_t, l_{t-1}$ , and  $u_{t-1}$ ). Therefore,

$$R_T^{\text{Bayes}} \leq \mathbb{E} \left[ \sum_{t=1}^T \frac{\delta \sqrt{2}}{|\mathbb{X}| \sqrt{\pi}} \pi_t^{-1} + 2\beta_t^{1/2} \sigma_{t-1}(\mathbf{x}_t, \mathbf{w}_t) \right] \quad (45)$$

$$\leq \frac{\delta \sqrt{2}}{|\mathbb{X}| \sqrt{\pi}} + \sqrt{C_1 T \beta_T \gamma_T} \quad (46)$$

where  $C_1, \beta_T, \delta, \gamma_T$  are elaborated in Theorem 2.

## I Experimental Details

We use the Matérn 5/2 kernel,

$$\kappa(\mathbf{x}, \mathbf{w}; \mathbf{x}', \mathbf{w}') = \sigma_s^2 \left( 1 + \sqrt{5}r + \frac{5r^2}{3} \right) \exp(-\sqrt{5}r) \quad (47)$$

where  $r^2 \triangleq (\mathbf{x} - \mathbf{x}')^\top \mathbf{L}_x^{-2} (\mathbf{x} - \mathbf{x}') + (\mathbf{w} - \mathbf{w}')^\top \mathbf{L}_w^{-2} (\mathbf{w} - \mathbf{w}')$  is the squared scaled Euclidean distance between  $[\mathbf{x}, \mathbf{w}]$  and  $[\mathbf{x}', \mathbf{w}']$ ,  $\mathbf{L}_x \triangleq \text{diag}[l_1, \dots, l_m]$  and  $\mathbf{L}_w \triangleq \text{diag}[l_{m+1}, \dots, l_{m+n}]$  are the length-scales.

At BO iteration  $t$ , the GP hyperparameters (i.e.,  $\sigma_s^2, \mathbf{L}_x$ , and  $\mathbf{L}_w$ ) and the noise variance  $\sigma_n^2$  are learned by maximizing the likelihood of the observations  $\mathbf{y}_{\mathbf{D}_{t-1}}$ . We impose a Gamma prior distribution of shape 1.1 and scale 0.5 over the noise variance and initialize the noise variance  $\sigma_n^2$  at the mode of its prior distribution, i.e., 0.05 (which is adopted from the implementation of [4]).

The domains of all input dimensions in the experiments are standardized to the range  $[0, 1]$ . There are 3 initial observations for the experiments with the Branin-Hoo and Goldstein-Price functions, and 20 initial observations for the experiment with the Hartmann-6D function with  $m = 5$  and 10 initial

observations for the experiment with the Hartmann-6D function with  $m = 1$ . The sizes  $|\mathbb{W}|$  in the experiments with Branin-Hoo, Goldstein-Price, Hartmann-6D  $m = 5$ , and Hartmann-6D  $m = 1$  are 30, 50, 15, and 243, respectively. We perform experiments with both uniform distributions of  $\mathbf{W}$  (in the experiments with Branin-Hoo and Goldstein-Price) and a non-uniform distribution of  $\mathbf{W}$  (in the experiment with Hartmann-6D). The non-uniform distribution is a discretized Gaussian distribution with mean 0.5 and standard deviation 0.2 over the support of  $\mathbf{W}$ .

In the yacht hydrodynamics experiment, we would like to minimize the residuary resistance per unit weight of displacement of a yacht by searching for the optimal hull geometry coefficients of the yacht in the face of the uncertainty in the Froude number (the Froude number depends on the real-world environment and we assume that it can be simulated with computers during the optimization). The ground truth function is constructed using the yacht hydrodynamics data set [5]. The dimension of the input variables  $\mathbf{x}$  and  $\mathbf{W}$  are  $m = 5$  and  $n = 1$  (the Froude number), respectively. The environmental random variable  $\mathbf{W}$  follows a discrete uniform random variable over the support of 15 values.

The simulated robot pushing experiment is taken from [23]. The simulation returns the location of a pushed object given the robot’s location and the pushing duration, i.e.,  $\mathbf{x}$ . The locations are 2 dimensional and standardized in  $[0, 1]^2$ . We follow the setting in [13] to perturb the robot’s location with  $\mathbf{W}$  following a discrete uniform distribution over 64 points in  $[0, 1]^2$ . The location of the pushed object returned by the simulation is added with a Gaussian noise of variance 0.0001 to generate noisy observations. There are 30 initial observations, i.e.,  $|\mathbf{D}_0| = 30$ .

The portfolio optimization problem is taken from [4]. The objective function is the average daily return over a period of 4 years (obtained by a simulation) given the risk and trade aversion parameters, and the holding cost multiplier. The environmental random variables  $\mathbf{W}$  include the bid-ask spread and the borrow cost. The distribution of  $\mathbf{W}$  is a discretized Gaussian distribution with mean 0.5 and standard deviation 0.15 over 25 points in  $[0.25, 0.75]^2$ . The average daily returns are added with a Gaussian noise of variance 0.0001 to generate noisy observations. There are 30 initial observations, i.e.,  $|\mathbf{D}_0| = 30$ .
